# Supplementary material for: Genome-wide determination of poly(A) sites in Medicago truncatula: evolutionary conservation of alternative poly(A) site choice
Source: PubMed Central journal article supplement (PMC4117952; doi:10.1186/1471-2164-15-615), 2014-07-21
Supplement: 12864_2014_6307_MOESM1_ESM.pdf [file 12864_2014_6307_MOESM1_ESM.pdf]

## Wu et al., Additional file 1 – Supplemental tables

Table S1. Distribution of PATs that map to multiple positions.

| Genomic region                | <i>M. truncatula</i> |             |             |             | <i>Arabidopsis</i> |             |                   |             |
|-------------------------------|----------------------|-------------|-------------|-------------|--------------------|-------------|-------------------|-------------|
|                               | PAT#                 | PAT%        | Dup#        | Dup%        | PAT#               | PAT%        | Dup# <sup>3</sup> | Dup%        |
| 3'-UTR                        | 196880               | 24.87%      | 227841      | 11.69%      | 7831               | 5.97%       | 13379             | 5.16%       |
| 5'-UTR                        | 109256               | 13.80%      | 109267      | 5.60%       | 977                | 0.74%       | 989               | 0.38%       |
| AMB                           | 3649                 | 0.46%       | 4579        | 0.23%       | 2779               | 2.12%       | 4480              | 1.73%       |
| CDS                           | 96959                | 12.25%      | 163547      | 8.39%       | 577                | 0.44%       | 921               | 0.36%       |
| Exon <sup>1</sup>             | -                    | -           | -           | -           | 89795              | 68.44%      | 17792<br>9        | 68.66%      |
| Intergenic                    | 306657               | 38.74%      | 134518<br>9 | 68.99%      | 14717              | 11.22%      | 33564             | 12.95%      |
| Promoter <sup>2</sup>         | 69019                | 8.72%       | 84899       | 4.35%       | 10962              | 8.36%       | 22664             | 8.75%       |
| Intron                        | 9186                 | 1.16%       | 14476       | 0.74%       | 2665               | 2.03%       | 4341              | 1.68%       |
| Pseudogenic exon <sup>1</sup> | -                    | -           | -           | -           | 895                | 0.68%       | 896               | 0.35%       |
| Total <sup>4</sup>            | 791606               | 100.00<br>% | 194979<br>8 | 100.00<br>% | 13119<br>8         | 100.00<br>% | 25916<br>3        | 100.00<br>% |

<sup>1</sup> The exon and pseudogenic\_exon regions are from non-mRNA such as ncRNA and snRNA. For mRNA, the CDS is counted and exon is not. In the *Arabidopsis* gff file, there are many classes of non-mRNAs. In *M. truncatula*'s GFF file, there are only mRNAs, and no non-mRNA, so no PATs is found in exon or pseudogenic\_exon.

<sup>2</sup> The promoter is defined as the 2000 nt region upstream of the 5'-UTR.

<sup>3</sup> "Dup#" is total number of genomic locations that are defined by PATs that map to multiple positions.

<sup>4</sup> Since the numbers in this table are counted within each region, the total number of the unique PATs (PAT#) is not the sum of the PAT# of all the regions.

Table S2. Genomic distributions of PACs with single PAT in *M. truncatula*.

| Region <sup>1</sup> | PAC#  | PAC% | PAC# (PAT=1) | PAC(PAT=1)/PAC(all) |
|---------------------|-------|------|--------------|---------------------|
| 3'-UTR              | 26915 | 63.2 | 10574        | 39.29               |
| 5'-UTR              | 34    | 0.08 | 23           | 67.65               |
| AMB                 | 3104  | 7.29 | 1398         | 45.04               |
| CDS                 | 4470  | 10.5 | 2617         | 58.55               |
| Intergenic          | 4843  | 11.3 | 3032         | 62.61               |
| Promoter            | 724   | 1.70 | 439          | 60.64               |
| Intron              | 2501  | 5.87 | 1610         | 64.37               |
| Total               | 42591 | 100  | 19693        | 46.24               |

1: Region designations are as in Table S1.

Table S3. Significant GO terms for *Arabidopsis* genes with CDS PACs [FDR (False Discovery Rate)<0.01].

| Ontology <sup>1</sup> | Term                                                                                           | Gene# | FDR      |
|-----------------------|------------------------------------------------------------------------------------------------|-------|----------|
| F                     | nucleoside-triphosphatase activity                                                             | 51    | 1.40E-17 |
| F                     | hydrolase activity, acting on acid anhydrides, in phosphorus-containing anhydrides             | 51    | 4.00E-17 |
| F                     | hydrolase activity, acting on acid anhydrides                                                  | 51    | 4.00E-17 |
| F                     | pyrophosphatase activity                                                                       | 51    | 4.00E-17 |
| P                     | post-embryonic development                                                                     | 45    | 8.50E-15 |
| C                     | plasma membrane                                                                                | 65    | 1.30E-14 |
| F                     | ATPase activity                                                                                | 35    | 4.00E-14 |
| F                     | ATPase activity, coupled                                                                       | 29    | 6.20E-13 |
| F                     | catalytic activity                                                                             | 210   | 1.60E-09 |
| P                     | multicellular organismal process                                                               | 69    | 5.50E-09 |
| P                     | multicellular organismal development                                                           | 66    | 1.40E-08 |
| P                     | developmental process                                                                          | 71    | 2.60E-08 |
| C                     | intracellular part                                                                             | 199   | 3.10E-08 |
| C                     | intracellular                                                                                  | 204   | 3.80E-08 |
| F                     | purine ribonucleotide binding                                                                  | 54    | 4.10E-08 |
| F                     | ribonucleotide binding                                                                         | 54    | 4.10E-08 |
| C                     | intracellular organelle                                                                        | 176   | 4.60E-08 |
| C                     | organelle                                                                                      | 176   | 4.60E-08 |
| F                     | nucleotide binding                                                                             | 67    | 4.90E-08 |
| C                     | membrane-bounded organelle                                                                     | 166   | 5.10E-08 |
| F                     | ATP binding                                                                                    | 48    | 5.20E-08 |
| P                     | response to abiotic stimulus                                                                   | 52    | 5.30E-08 |
| F                     | adenyl ribonucleotide binding                                                                  | 48    | 5.60E-08 |
| F                     | purine nucleotide binding                                                                      | 55    | 5.80E-08 |
| C                     | intracellular membrane-bounded organelle                                                       | 165   | 6.60E-08 |
| C                     | cytoplasmic part                                                                               | 141   | 7.90E-08 |
| C                     | cytoplasm                                                                                      | 150   | 8.60E-08 |
| F                     | purine nucleoside binding                                                                      | 49    | 9.00E-08 |
| F                     | nucleoside binding                                                                             | 49    | 9.00E-08 |
| F                     | adenyl nucleotide binding                                                                      | 49    | 9.00E-08 |
| P                     | reproductive developmental process                                                             | 39    | 2.50E-07 |
| F                     | ATPase activity, coupled to transmembrane movement of substances                               | 15    | 3.50E-07 |
| F                     | ATPase activity, coupled to movement of substances                                             | 15    | 3.50E-07 |
| F                     | hydrolase activity, acting on acid anhydrides, catalyzing transmembrane movement of substances | 15    | 3.90E-07 |
| F                     | glucosyltransferase activity                                                                   | 13    | 5.30E-07 |
| P                     | response to stimulus                                                                           | 100   | 6.80E-07 |
| P                     | reproductive process                                                                           | 42    | 7.70E-07 |
| F                     | hydrolase activity                                                                             | 85    | 9.40E-07 |

|   |                                                                 |     |          |
|---|-----------------------------------------------------------------|-----|----------|
| F | transferase activity                                            | 82  | 1.10E-06 |
| P | reproduction                                                    | 42  | 1.20E-06 |
| P | reproductive structure development                              | 37  | 1.50E-06 |
| F | transferase activity, transferring phosphorus-containing groups | 54  | 1.70E-06 |
| F | ATP-dependent helicase activity                                 | 12  | 1.70E-06 |
| F | kinase activity                                                 | 49  | 1.70E-06 |
| F | purine NTP-dependent helicase activity                          | 12  | 1.70E-06 |
| C | membrane                                                        | 95  | 2.10E-06 |
| P | anatomical structure development                                | 52  | 4.20E-06 |
| P | cellular process                                                | 225 | 6.60E-06 |
| C | nucleus                                                         | 66  | 1.00E-05 |
| F | primary active transmembrane transporter activity               | 15  | 1.10E-05 |
| F | motor activity                                                  | 10  | 1.10E-05 |
| F | helicase activity                                               | 13  | 1.10E-05 |
| F | P-P-bond-hydrolysis-driven transmembrane transporter activity   | 15  | 1.10E-05 |
| P | seed development                                                | 24  | 1.60E-05 |
| P | embryonic development ending in seed dormancy                   | 22  | 2.20E-05 |
| P | cellular nitrogen compound metabolic process                    | 23  | 2.30E-05 |
| C | cytosol                                                         | 31  | 3.00E-05 |
| P | fruit development                                               | 24  | 3.10E-05 |
| P | response to temperature stimulus                                | 22  | 3.70E-05 |
| F | protein binding                                                 | 69  | 3.70E-05 |
| P | response to stress                                              | 60  | 4.40E-05 |
| P | embryonic development                                           | 23  | 4.70E-05 |
| F | phosphotransferase activity, alcohol group as acceptor          | 35  | 5.10E-05 |
| P | cellular metabolic process                                      | 168 | 7.60E-05 |
| F | microtubule motor activity                                      | 8   | 9.40E-05 |
| F | cellulose synthase activity                                     | 6   | 0.00012  |
| C | cell part                                                       | 264 | 0.00015  |
| C | cell                                                            | 264 | 0.00015  |
| P | macromolecule metabolic process                                 | 139 | 0.00023  |
| P | primary metabolic process                                       | 169 | 0.00023  |
| F | transferase activity, transferring hexosyl groups               | 15  | 0.00047  |
| P | response to heat                                                | 11  | 0.00048  |
| P | metabolic process                                               | 192 | 0.0005   |
| F | binding                                                         | 196 | 0.00058  |
| C | vacuole                                                         | 16  | 0.00074  |
| P | developmental growth                                            | 13  | 0.00093  |
| F | inositol or phosphatidylinositol kinase activity                | 6   | 0.001    |
| P | response to chemical stimulus                                   | 50  | 0.0015   |
| P | polysaccharide metabolic process                                | 10  | 0.0015   |
| F | protein kinase activity                                         | 27  | 0.0015   |
| P | multi-organism process                                          | 25  | 0.0016   |

|   |                                                                                       |     |        |
|---|---------------------------------------------------------------------------------------|-----|--------|
| P | cellular macromolecule metabolic process                                              | 122 | 0.0016 |
| P | regulation of developmental process                                                   | 16  | 0.0016 |
| P | growth                                                                                | 15  | 0.0017 |
| P | response to water deprivation                                                         | 12  | 0.0019 |
| P | post-translational protein modification                                               | 34  | 0.0019 |
| P | response to external stimulus                                                         | 17  | 0.0019 |
| F | UDP-glucosyltransferase activity                                                      | 7   | 0.0023 |
| P | regulation of multicellular organismal process                                        | 13  | 0.0026 |
| P | glucan biosynthetic process                                                           | 6   | 0.0026 |
| P | response to water                                                                     | 12  | 0.0026 |
| F | ATPase activity, coupled to transmembrane movement of ions                            | 6   | 0.0026 |
| F | transferase activity, transferring glycosyl groups                                    | 18  | 0.0028 |
| C | organelle part                                                                        | 55  | 0.0028 |
| C | microtubule associated complex                                                        | 5   | 0.0028 |
| C | plastid                                                                               | 62  | 0.0028 |
| C | intracellular organelle part                                                          | 55  | 0.0028 |
| P | phosphorylation                                                                       | 30  | 0.003  |
| F | beta-galactosidase activity                                                           | 5   | 0.0035 |
| C | macromolecular complex                                                                | 48  | 0.0035 |
| P | polysaccharide biosynthetic process                                                   | 8   | 0.0036 |
| P | protein metabolic process                                                             | 80  | 0.0037 |
| P | nitrogen compound metabolic process                                                   | 77  | 0.0037 |
| P | protein modification process                                                          | 37  | 0.0037 |
| P | macromolecule localization                                                            | 17  | 0.0037 |
| P | regulation of developmental growth                                                    | 5   | 0.0039 |
| P | cellular glucan metabolic process                                                     | 7   | 0.0041 |
| F | ATPase activity, coupled to transmembrane movement of ions, phosphorylative mechanism | 5   | 0.0041 |
| P | regulation of biological process                                                      | 74  | 0.0044 |
| P | biological regulation                                                                 | 82  | 0.0044 |
| P | glucan metabolic process                                                              | 7   | 0.0044 |
| P | cellular localization                                                                 | 19  | 0.0044 |
| P | intracellular signaling cascade                                                       | 21  | 0.0044 |
| P | cellular amino acid metabolic process                                                 | 16  | 0.0044 |
| P | phosphate metabolic process                                                           | 31  | 0.0044 |
| P | phosphorus metabolic process                                                          | 31  | 0.0044 |
| P | cellular amine metabolic process                                                      | 16  | 0.005  |
| P | cellular protein metabolic process                                                    | 70  | 0.0056 |
| F | translation factor activity, nucleic acid binding                                     | 9   | 0.0056 |
| F | galactosidase activity                                                                | 5   | 0.0057 |
| P | response to wounding                                                                  | 10  | 0.006  |
| P | organ development                                                                     | 24  | 0.006  |
| P | response to biotic stimulus                                                           | 20  | 0.006  |
| P | RNA metabolic process                                                                 | 39  | 0.006  |

|   |                                                                                                 |    |        |
|---|-------------------------------------------------------------------------------------------------|----|--------|
| P | meristem maintenance                                                                            | 6  | 0.006  |
| P | system development                                                                              | 24 | 0.006  |
| P | protein amino acid phosphorylation                                                              | 26 | 0.0061 |
| P | microtubule-based movement                                                                      | 5  | 0.0068 |
| C | chloroplast                                                                                     | 56 | 0.0068 |
| F | oxidoreductase activity, acting on the aldehyde or oxo group of donors, NAD or NADP as acceptor | 5  | 0.0072 |
| C | mitochondrion                                                                                   | 31 | 0.0074 |
| P | oxoacid metabolic process                                                                       | 24 | 0.0076 |
| P | carboxylic acid metabolic process                                                               | 24 | 0.0076 |
| P | cellular carbohydrate metabolic process                                                         | 15 | 0.0076 |
| P | organic acid metabolic process                                                                  | 24 | 0.0076 |
| P | cell surface receptor linked signaling pathway                                                  | 9  | 0.008  |
| P | macromolecule modification                                                                      | 38 | 0.008  |
| P | sulfur amino acid biosynthetic process                                                          | 5  | 0.0083 |
| P | regulation of meristem development                                                              | 6  | 0.0087 |
| P | establishment of localization in cell                                                           | 17 | 0.0097 |
| P | cellular ketone metabolic process                                                               | 24 | 0.0099 |

<sup>1</sup> F, molecular function; P, biological process; C, cellular component.

Note: *Arabidopsis* genes with CDS PACs were selected for gene functional annotation, using the DAVID Bioinformatics Resources (<http://david.abcc.ncifcrf.gov/>). All *Arabidopsis* genes expressed in this study were selected as background.
