# Supplementary material for: Genome-wide determination of poly(A) sites in Medicago truncatula: evolutionary conservation of alternative poly(A) site choice
Source: PubMed Central journal article supplement (PMC4117952; doi:10.1186/1471-2164-15-615), 2014-07-21
Supplement: 12864_2014_6307_MOESM2_ESM.pdf [file 12864_2014_6307_MOESM2_ESM.pdf]

Wu et al., Additional file 2 – Supplemental figures

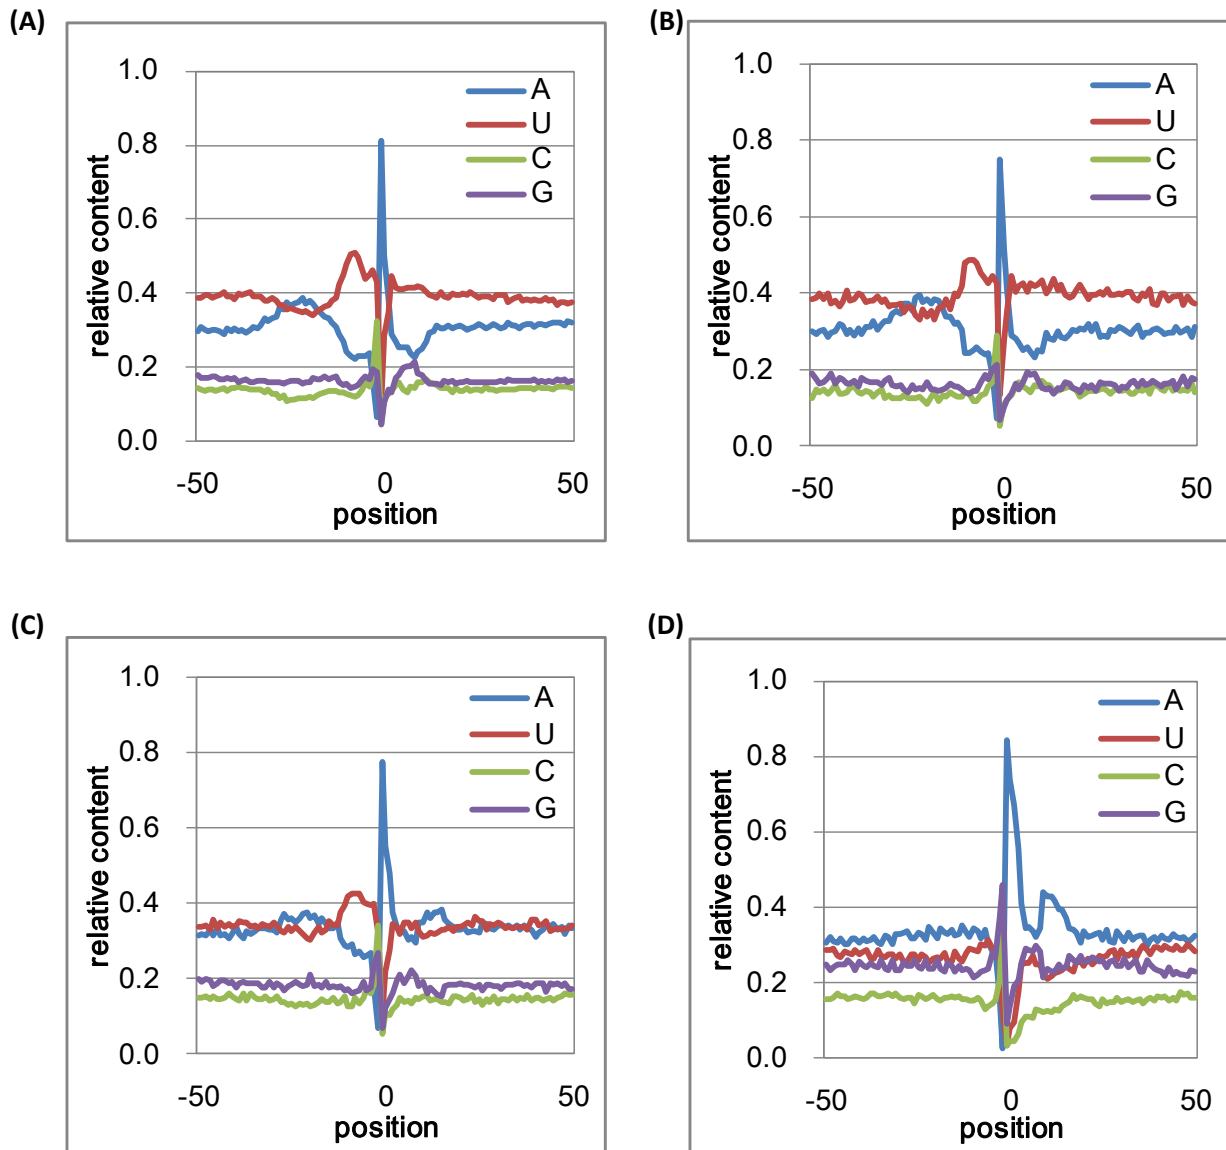

**Fig. S1 Nucleotide compositions of the sequences surrounding *M. truncatula* PACs defined by single PAT.**

Position-by-position base composition of PACs that map to 3'-UTRs (A), introns (B), intergenic regions (C), protein coding regions (D). Y-axis values are the fractional nucleotide content at each position (plotted along the x-axis); individual traces are color coded as indicated. On the x-axis, "0" denotes the actual cleavage/polyadenylation site.

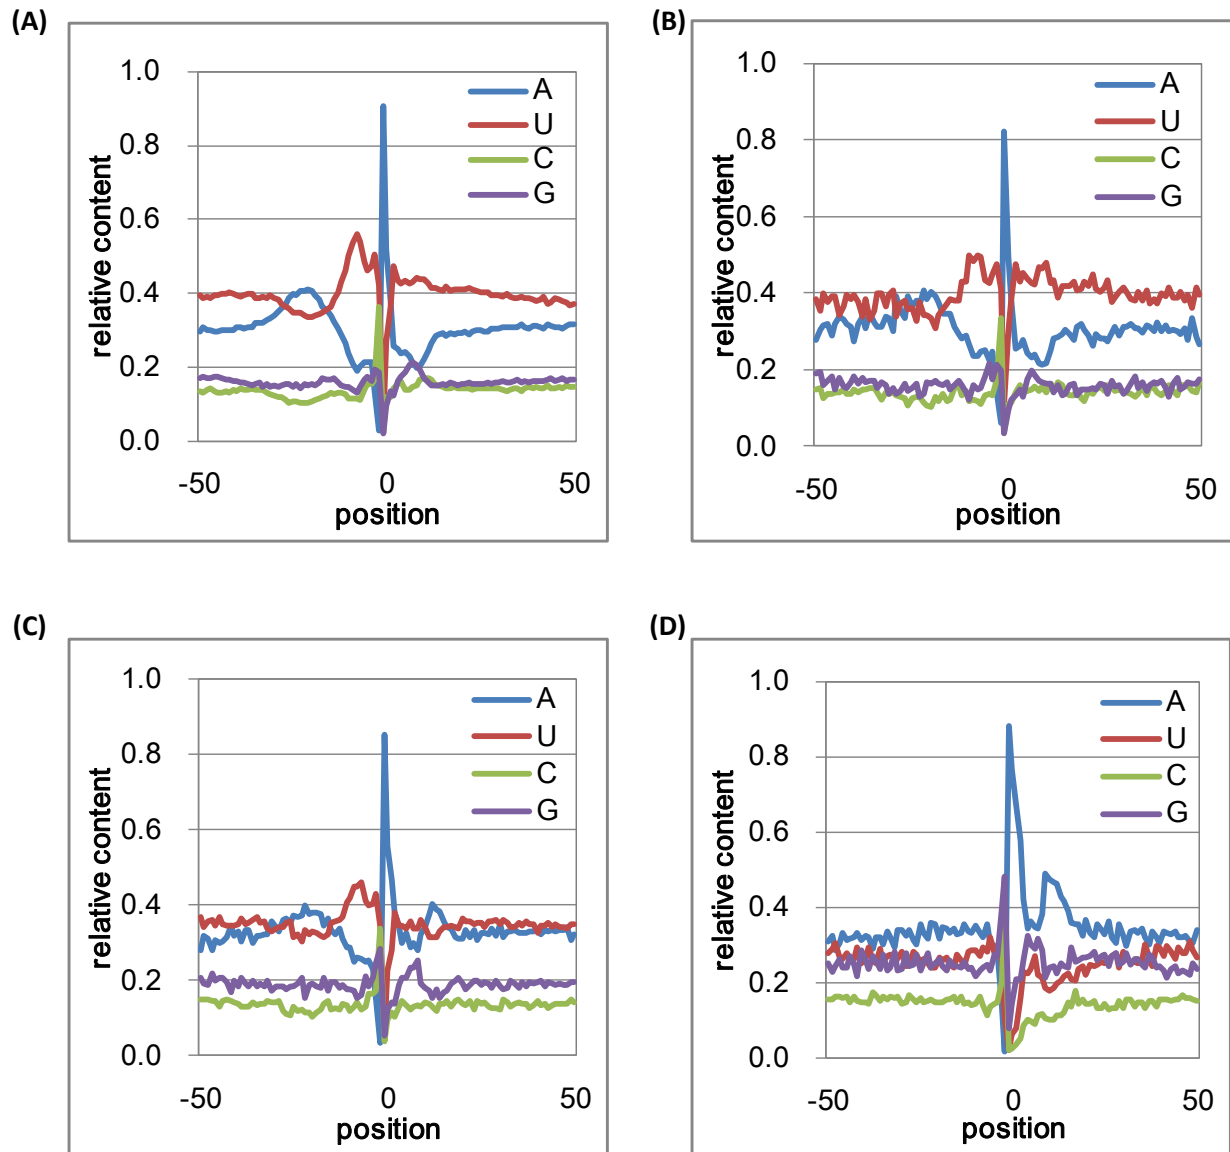

**Fig. S2 Nucleotide compositions of the sequences surrounding *M. truncatula* PACs defined by multiple PATs.**

Position-by-position base composition of PACs that map to 3'-UTRs (A), introns (B), intergenic regions (C), protein coding regions (D). Y-axis values are the fractional nucleotide content at each position (plotted along the x-axis); individual traces are color coded as indicated. On the x-axis, "0" denotes the actual cleavage/polyadenylation site.
